# Supplementary material for: Impact of Communication Measures Implemented During a School Tuberculosis Outbreak on Risk Perception among Parents and School Staff, Italy, 2019
Source: PubMed Central journal article supplement (PMC7037209; doi:10.3390/ijerph17030911), 2020-02-01
Supplement: ijerph-17-00911-s001.pdf [file ijerph-17-00911-s001.pdf]

# Supplementary Material

## Supplementary S1

### SURVEY PARENTS

- 1) Gender
  - Female  Male
- 2) Age
  - ≤ 30 yrs  31-40 yrs  41-50 yrs  > 50 yrs
- 3) Educational level
  - Primary school  Lower secondary school  Upper secondary school  Higher education (degree and Ph.D)
- 4) Which grade does your child attend?
  - 1<sup>st</sup> grade  2<sup>nd</sup> grade  3<sup>rd</sup> grade  4<sup>th</sup> grade  5<sup>th</sup> grade
- 5) How many hours per week did your child spend in close contact with the primary tuberculosis case?
  - None  Less than one  From one to five  From six to ten  More than ten
- 6) Did you know about tuberculosis as a disease before the recent events occurred at school?
  - Yes  No
- 7) Were you aware of tuberculosis cases in your province of residence in the last 2 years?
  - Yes  No
- 8) What was your perception of risk when you became aware of these tuberculosis cases?
  - No risk  Low risk  Moderate risk  High risk
- 9) What is your current perception of risk also considering the interventions carried out by the LHA?
  - No risk  Low risk  Moderate risk  High risk
- 10) Do you think the intervention of the LHA following the notification of the first case of tuberculosis was timely?
  - Yes  No
- 11) Were the meetings with the LHA operators useful in clearly defining the situation?
  - Yes  No
- 11.1) If you answered No to the previous question, what do you think was missing?
  - I wanted more meetings  Conflicting explanations were given  The meetings were delayed
  - Communication was not transparent  The risk was underestimated  Other
- 12) What aspect of the current tuberculosis outbreak caused you the greatest concern?
  - The number of notified cases  The type of disease
  - The fact that it happened at school  The fear of being affected by tuberculosis  Other fears
- 12.1) If you answered Other fears, specify your greatest concern \_\_\_\_\_
- 13) Which sources of information did you preferentially use to find out about the disease and its possible consequences?
  - Institutional websites (Ministry of Health, Epicentro website of the National Health Institute)
  - Search on specialized websites  Social networks  Television and newspapers
  - Healthcare staff of Local Health Authority  General practitioner and pediatrician
  - Other healthcare professional  Other people

## SURVEY SCHOOL STAFF

1) Gender

- Female  Male

2) Age

- ≤ 30 yrs  31-40 yrs  41-50 yrs  > 50 yrs

3) Occupation

- Teacher  Auxiliary staff

4) In which grade do you teach or carry out activities?

- 1<sup>st</sup> grade  2<sup>nd</sup> grade  3<sup>rd</sup> grade  4<sup>th</sup> grade  5<sup>th</sup> grade

5) How many hours per week did you spend in close contact with the primary tuberculosis case?

- None  Less than one  From one to five  From six to ten  More than ten

6) Did you know about tuberculosis as a disease before the recent events occurred at school?

- Yes  No

7) Were you aware of tuberculosis cases in your province of residence in the last 2 years?

- Yes  No

8) What was your perception of risk when you became aware of these tuberculosis cases?

- No risk  Low risk  Moderate risk  High risk

9) What is your current perception of risk also considering the intervention carried out by the LHA?

- No risk  Low risk  Moderate risk  High risk

10) Do you think the intervention of the LHA following the notification of the first case of tuberculosis was timely?

- Yes  No

11) Were the meetings with the LHA operators useful in clearly defining the situation?

- Yes  No

11.1) If you answered No to the previous question, what do you think was missing?

- I wanted more meetings  Conflicting explanations were given  The meetings were delayed  
 Communication was not transparent  The risk was underestimated  Other

12) What aspect of the current tuberculosis outbreak caused you the greatest concern?

- The number of notified cases  The type of disease  
 The fact that it happened at school  The fear of being affected by tuberculosis  Other fears

12.1) If you answered Other fears, specify your greatest concern \_\_\_\_\_

13) Which sources of information did you preferentially use to find out about the disease and its possible consequences?

- Institutional websites (Ministry of Health, Epicentro website of the National Health Institute)  
 Search on specialized websites  Social networks  Television and newspapers  
 Healthcare staff of Local Health Authority  General practitioner and pediatrician  
 Other healthcare professional  Other people

**Table S2:** Sign test of matched pairs and Wilcoxon matched-pairs signed-ranks test for parents

| Sign     | Observed,<br>n | Expected,<br>n | Sum ranks,<br>n | Expected,<br>n |
|----------|----------------|----------------|-----------------|----------------|
| positive | 375            | 231.5          | 192583          | 118528         |
| negative | 88             | 231.5          | 44473           | 118528         |
| zero     | 280            | 280            | 39340           | 39340          |
| all      | 743            | 743            | 276396          | 276396         |

Sign test

Two-sided test:

Ho: median of risk\_perceptionT0 – risk\_perceptionT1 = 0 vs.

Ha: median of risk\_perceptionT0 – risk\_perceptionT1 != 0

Pr(#positive >= 375 or #negative >= 375) =

$\min(1, 2 * \text{Binomial}(n = 463, x \geq 375, p = 0.5)) < 0.0001$

Sign rank

unadjusted variance 34250071

adjustment for ties -853220.5

adjustment for zeros -1839145

adjusted variance 31557706

Ho: risk\_perceptionT0 = risk\_perceptionT1

z = 13.183

Prob > |z| < 0.0001

**Table S3:** Sign test of matched pairs and Wilcoxon matched-pairs signed-ranks test for school staff

| Sign     | Observed,<br>n | Expected,<br>n | Sum ranks,<br>n | Expected,<br>n |
|----------|----------------|----------------|-----------------|----------------|
| positive | 27             | 15.5           | 1310            | 744            |
| negative | 4              | 15.5           | 178             | 744            |
| zero     | 32             | 32             | 528             | 528            |
| all      | 63             | 63             | 2016            | 2016           |

Sign test

Two-sided test:

Ho: median of risk\_perceptionT0 – risk\_perceptionT1 = 0 vs.

Ha: median of risk\_perceptionT0 – risk\_perceptionT1 ≠ 0

Pr(#positive ≥ 27 or #negative ≥ 27) =

$\min(1, 2 * \text{Binomial}(n = 31, x \geq 27, p = 0.5)) < 0.0001$

Sign rank

unadjusted variance 21336.00

adjustment for ties -294.50

adjustment for zeros -2860.00

adjusted variance 18181.50

Ho: risk\_perceptionT0 = risk\_perceptionT1

z = 4.198

Prob > |z| < 0.0001
